# Supplementary material for: Microbial communities and their predictive functional profiles in arid soil of Saudi Arabia
Source: Copernicus journal article supplement (doi:10.5194/soil-2020-31), 2020-06-09
Supplement: Supplementary file 1 [file soil-2020-31-supplement.pdf]

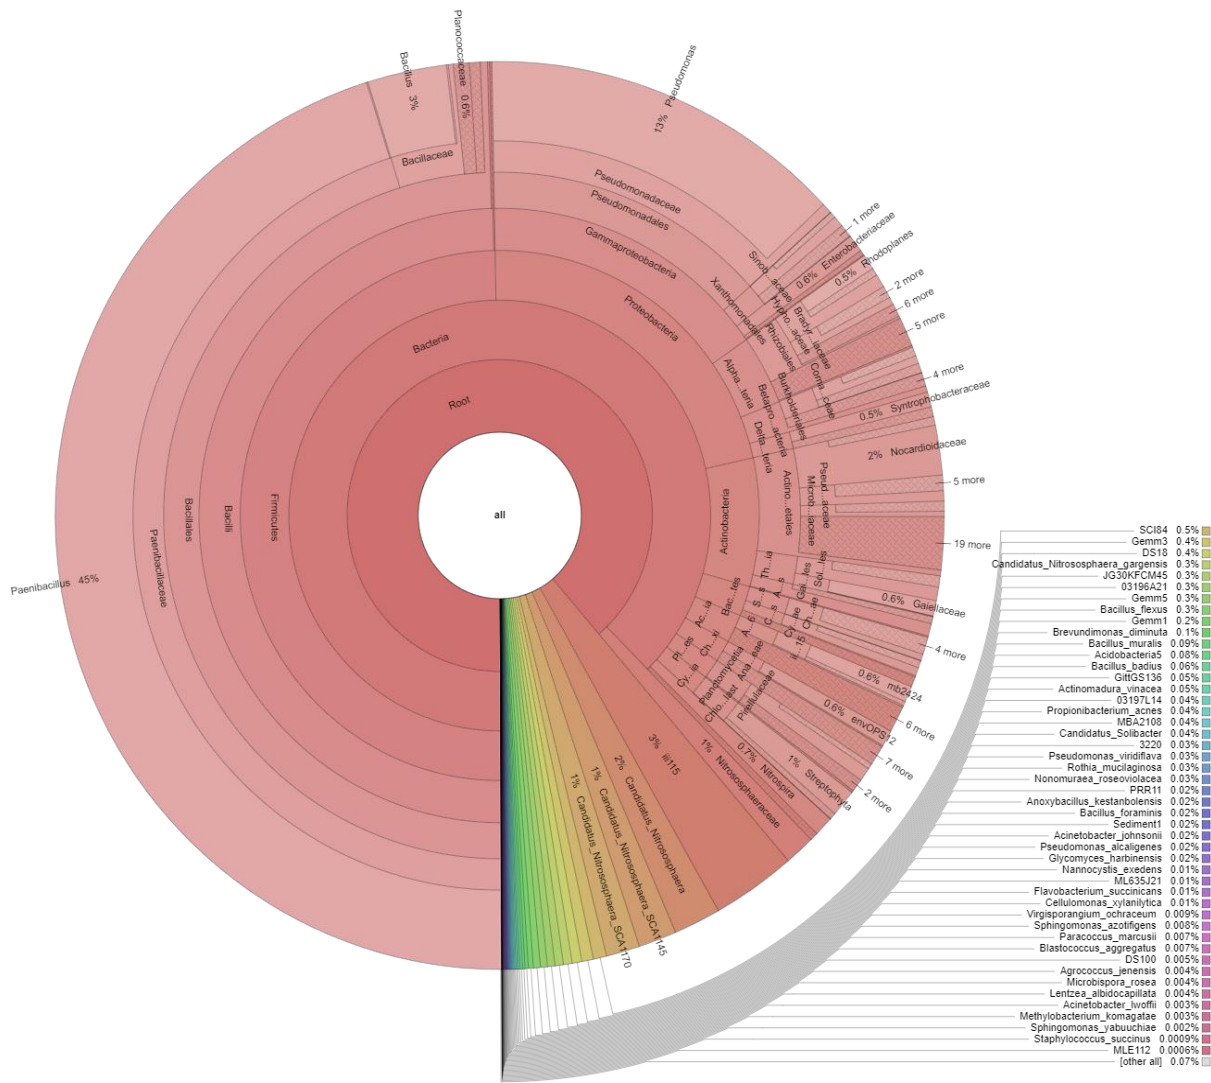

# M15

Supplementary fig. 1

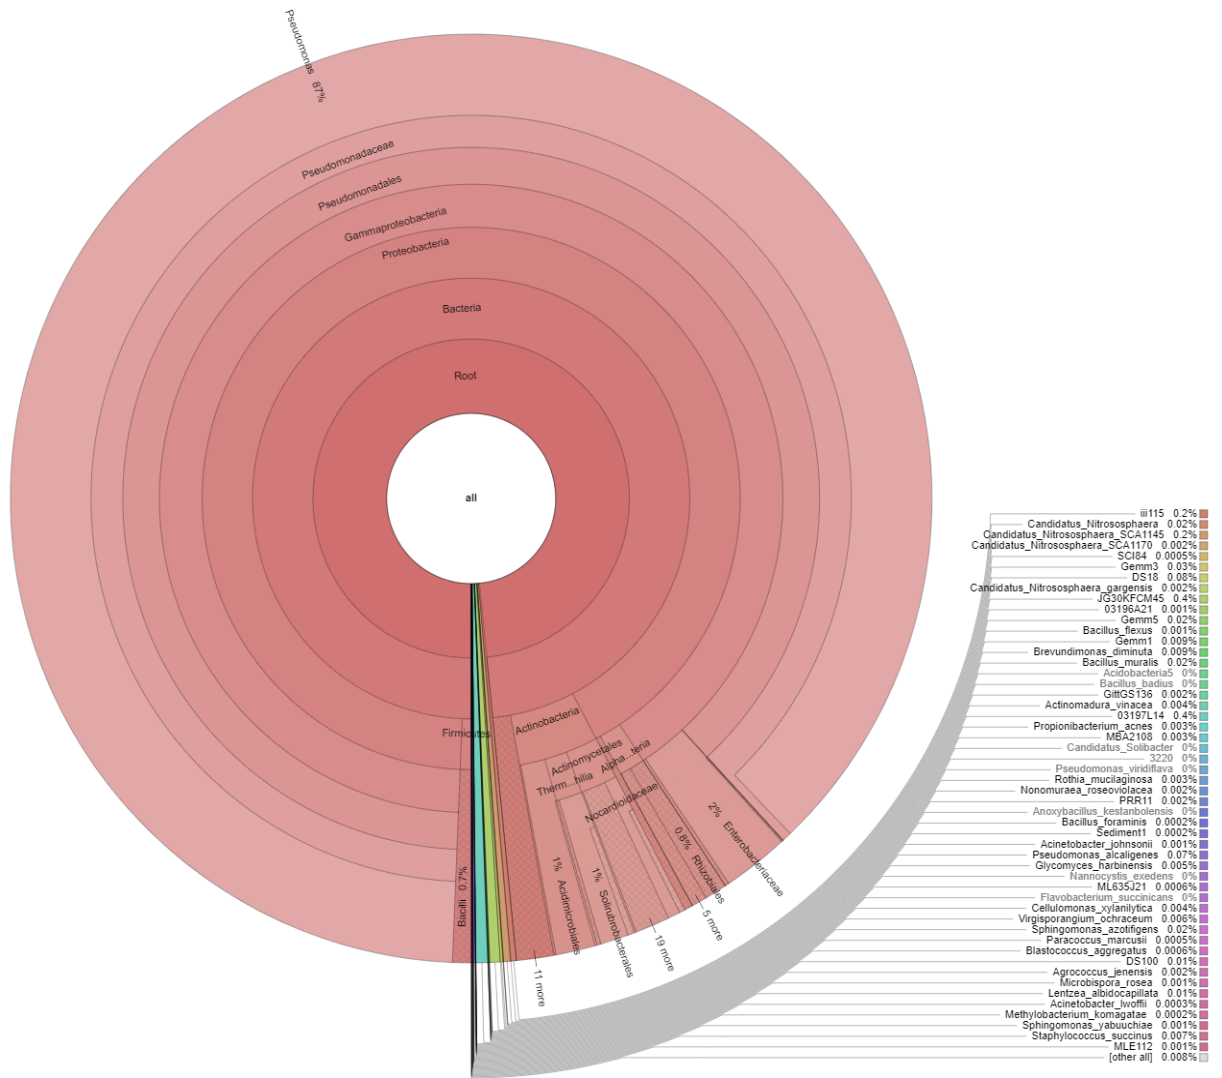

M5

Supplementary fig. 2

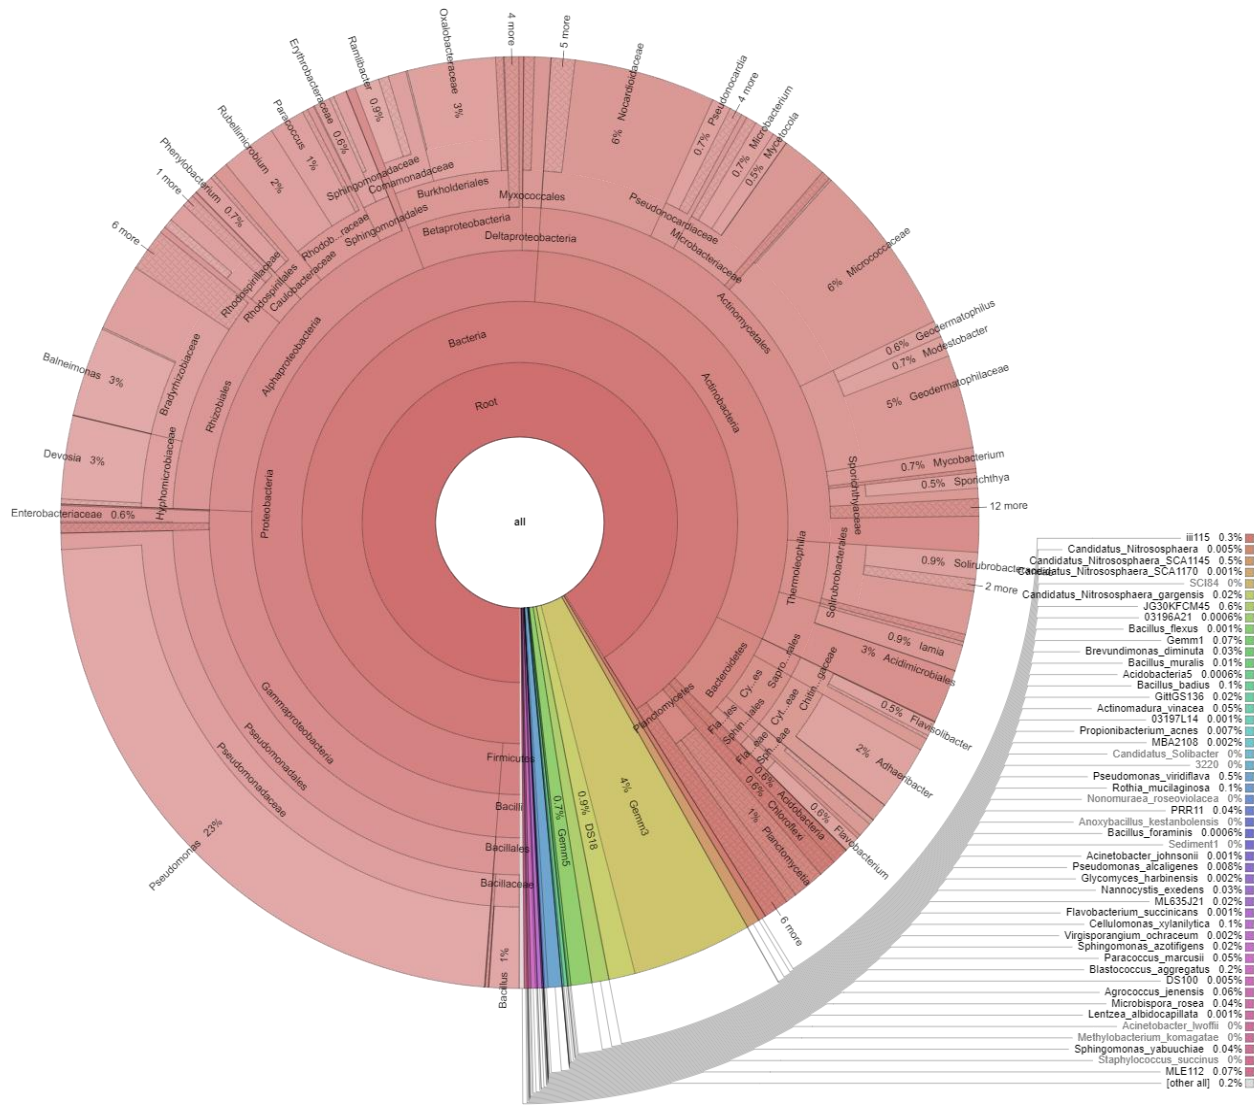

# ABHA

Supplementary fig. 3

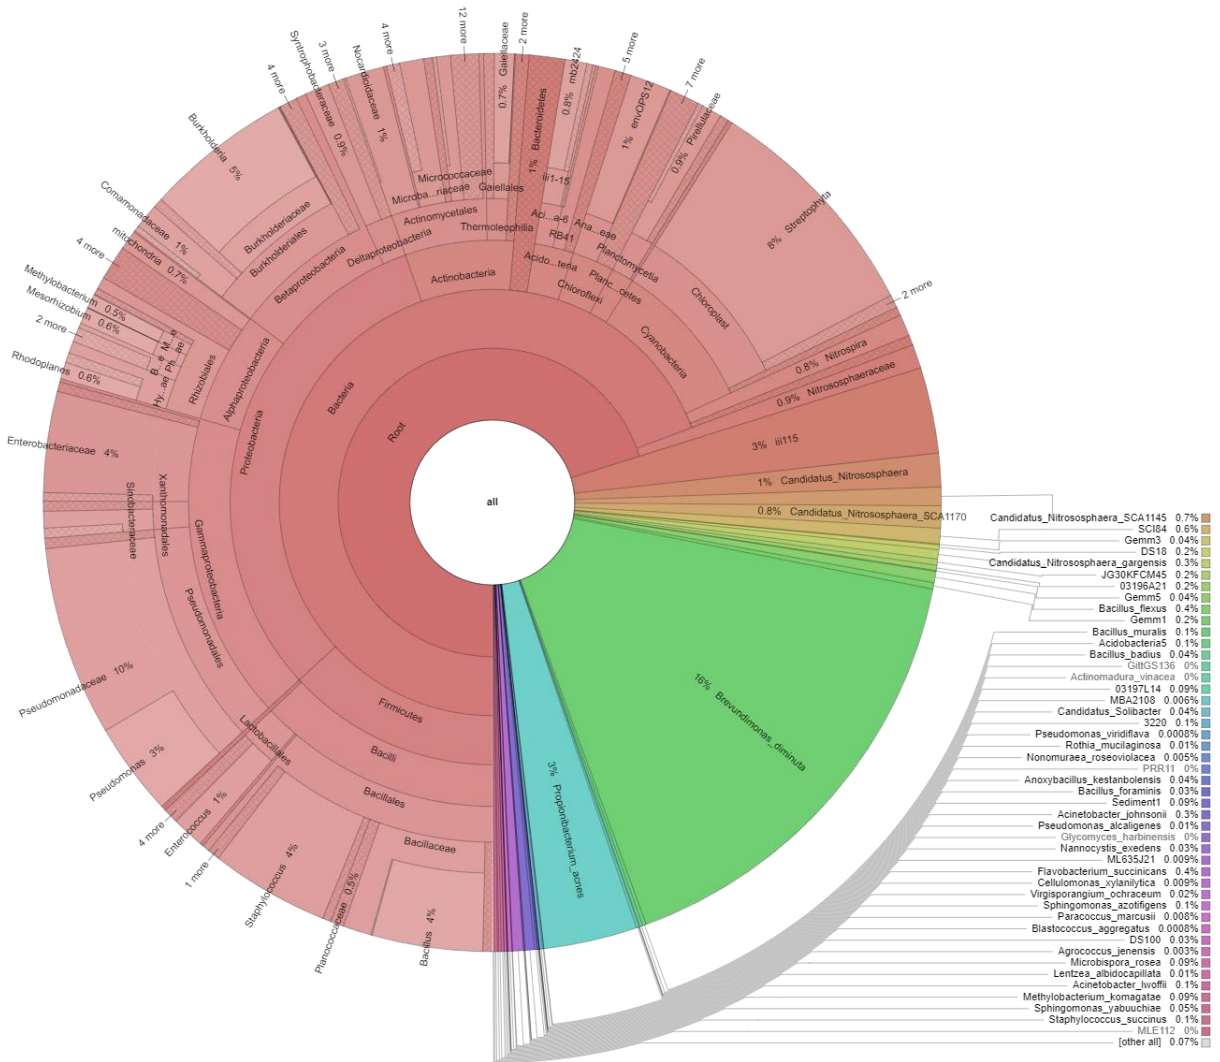

# Hafr Al-Batin

Supplementary fig. 4
